# Supplementary material for: Gene Prioritization by Compressive Data Fusion and Chaining
Source: PubMed Central journal article supplement (PMC4605714; doi:10.1371/journal.pcbi.1004552), 2015-10-14
Supplement: pcbi.1004552.s002.pdf [file pcbi.1004552.s002.pdf]

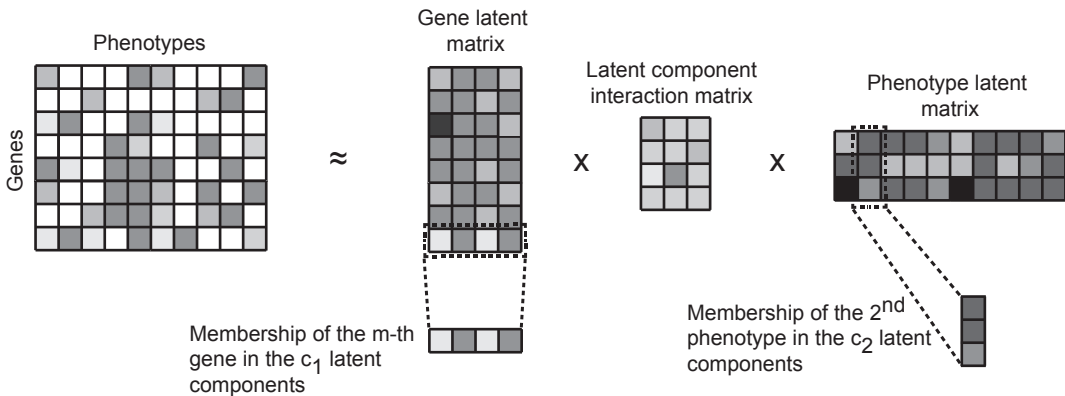
 $\mathbf{R}^{m \times n}$ 
 $\approx$ 
 $\mathbf{F}^{m \times c_1}$ 
 $\times$ 
 $\mathbf{S}^{c_1 \times c_2}$ 
 $\times$ 
 $\mathbf{G}^{c_2 \times n}$
