# Supplementary material for: Gene Prioritization by Compressive Data Fusion and Chaining
Source: PubMed Central journal article supplement (PMC4605714; doi:10.1371/journal.pcbi.1004552), 2015-10-14

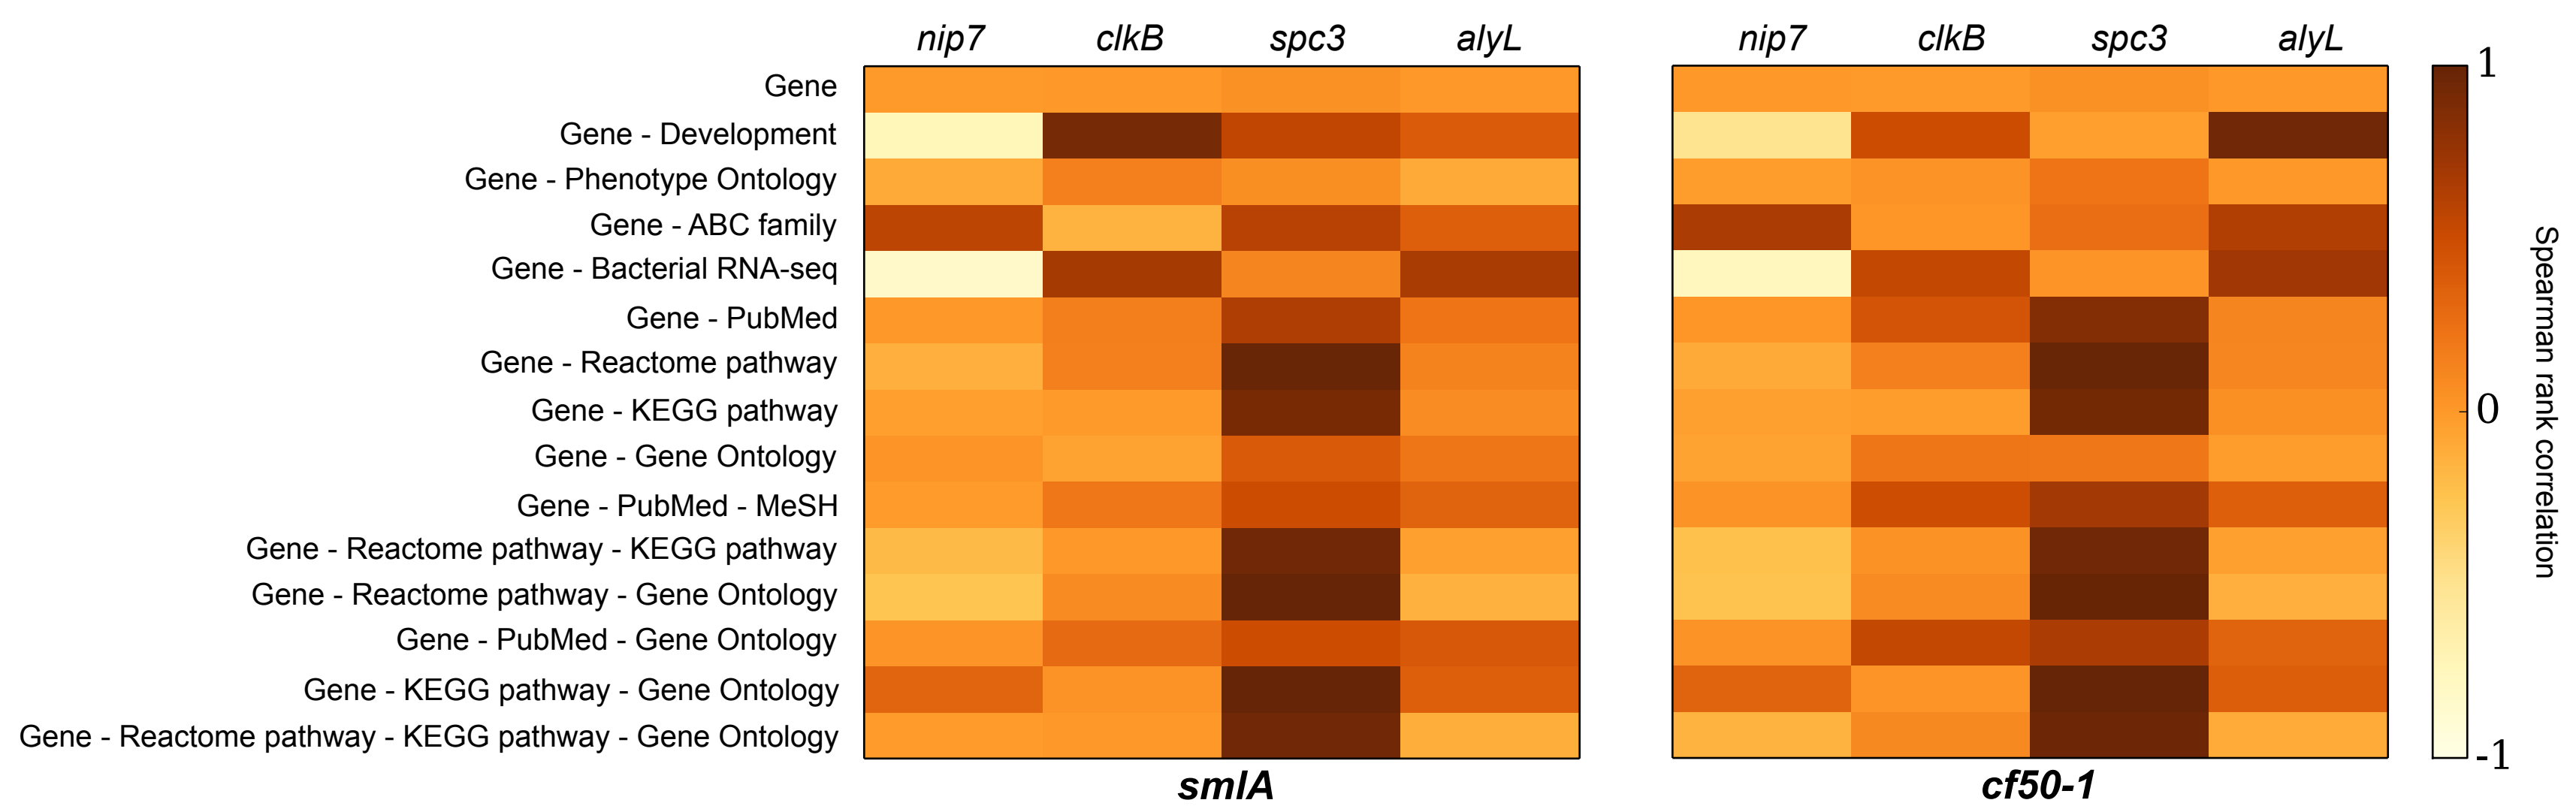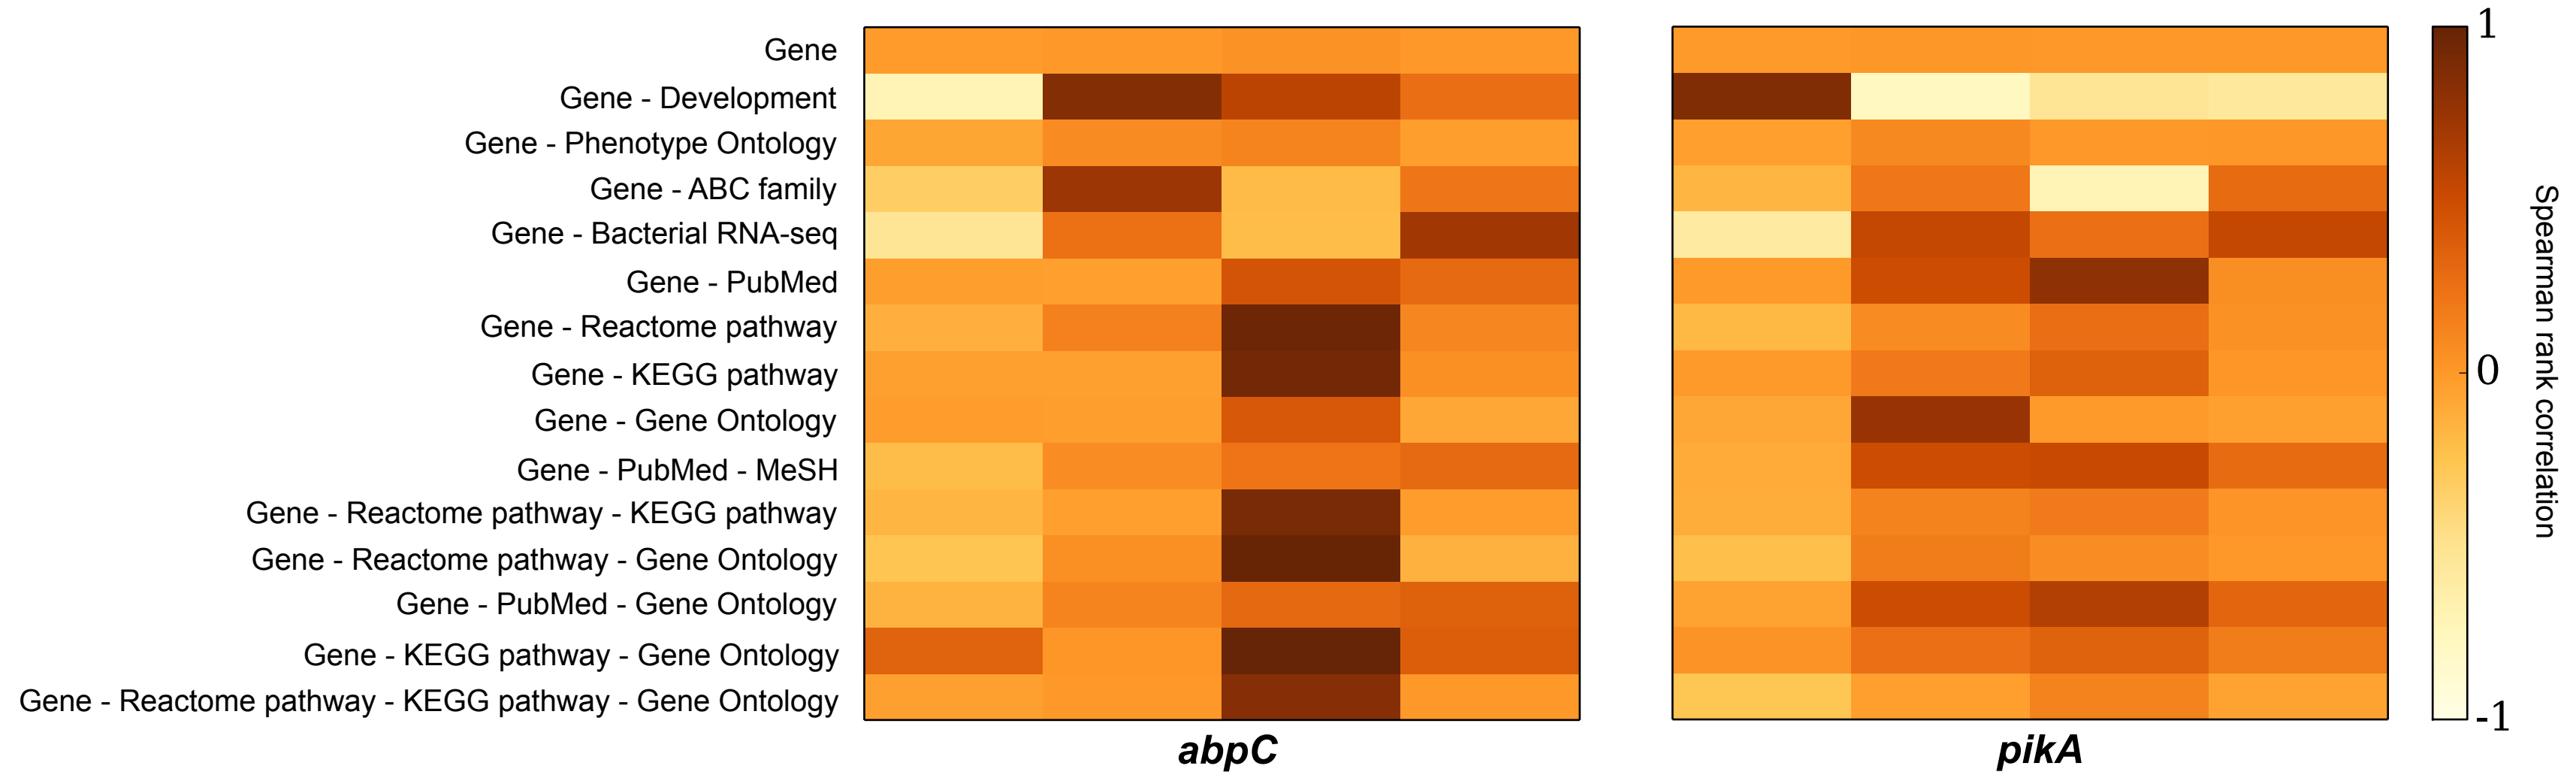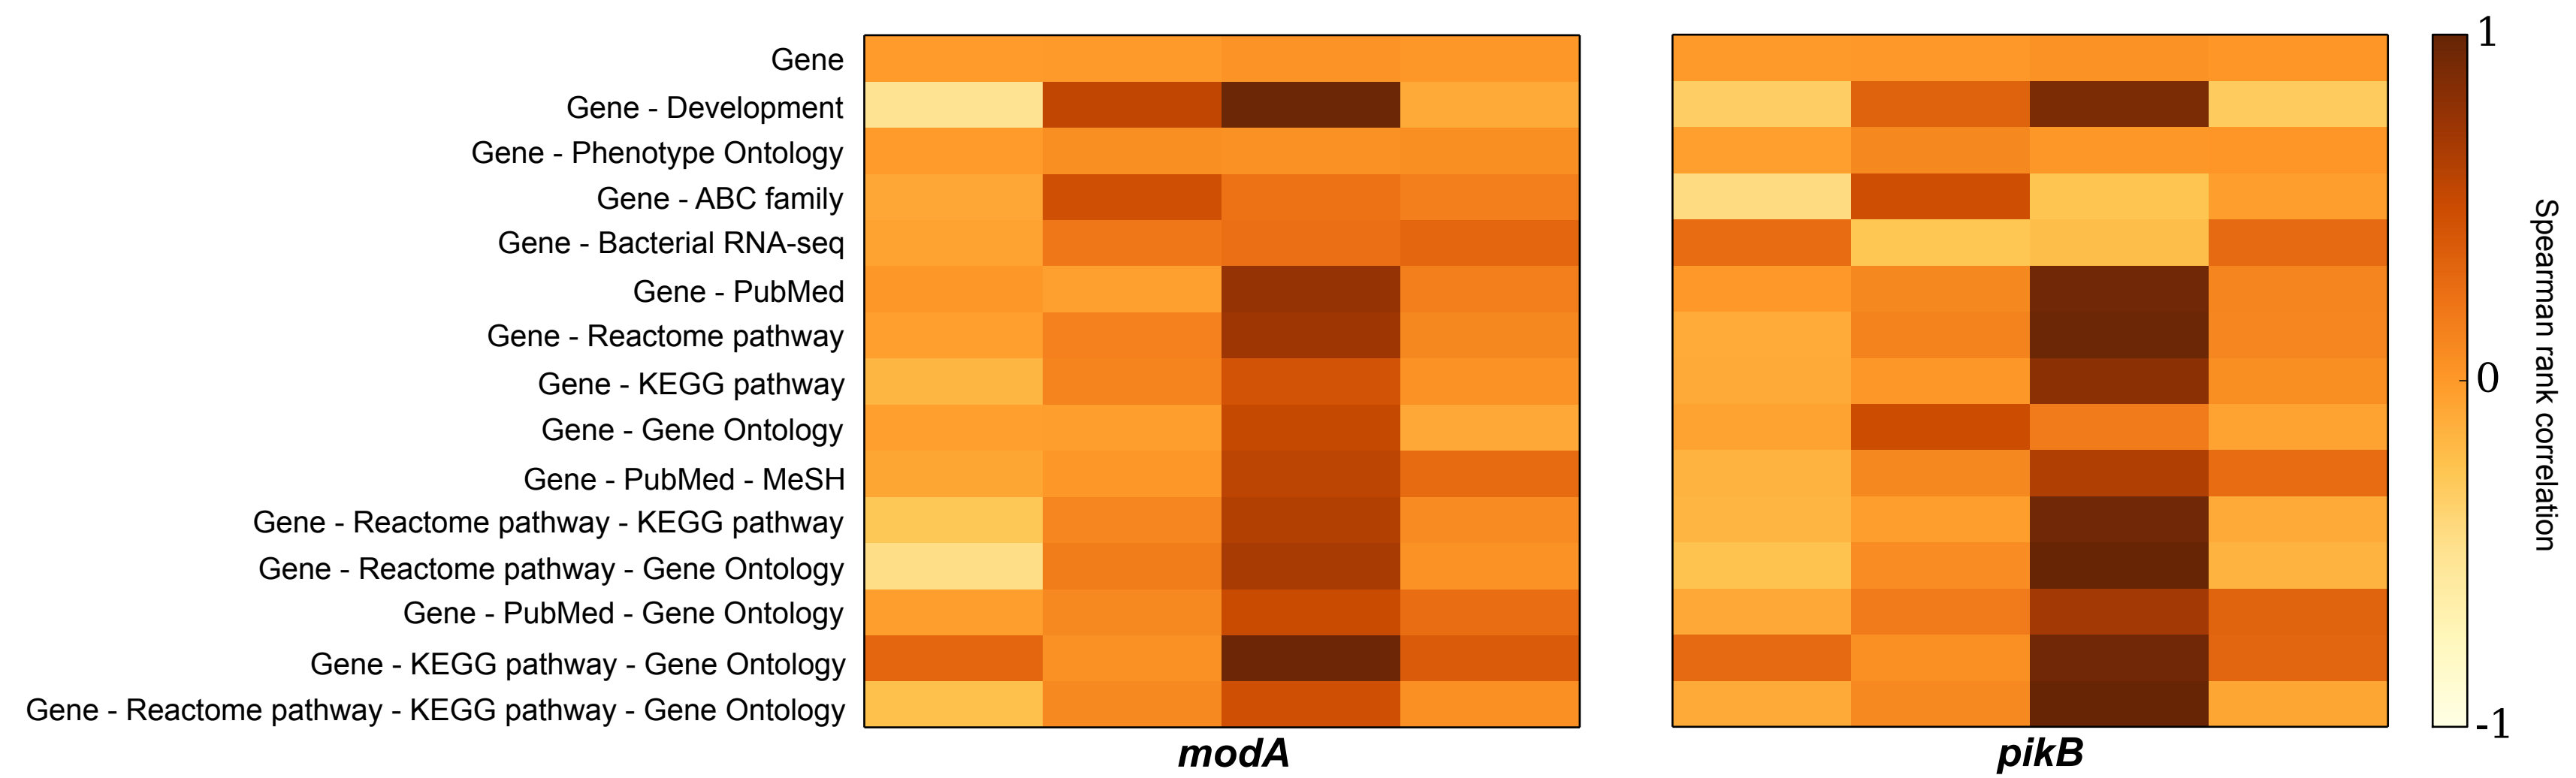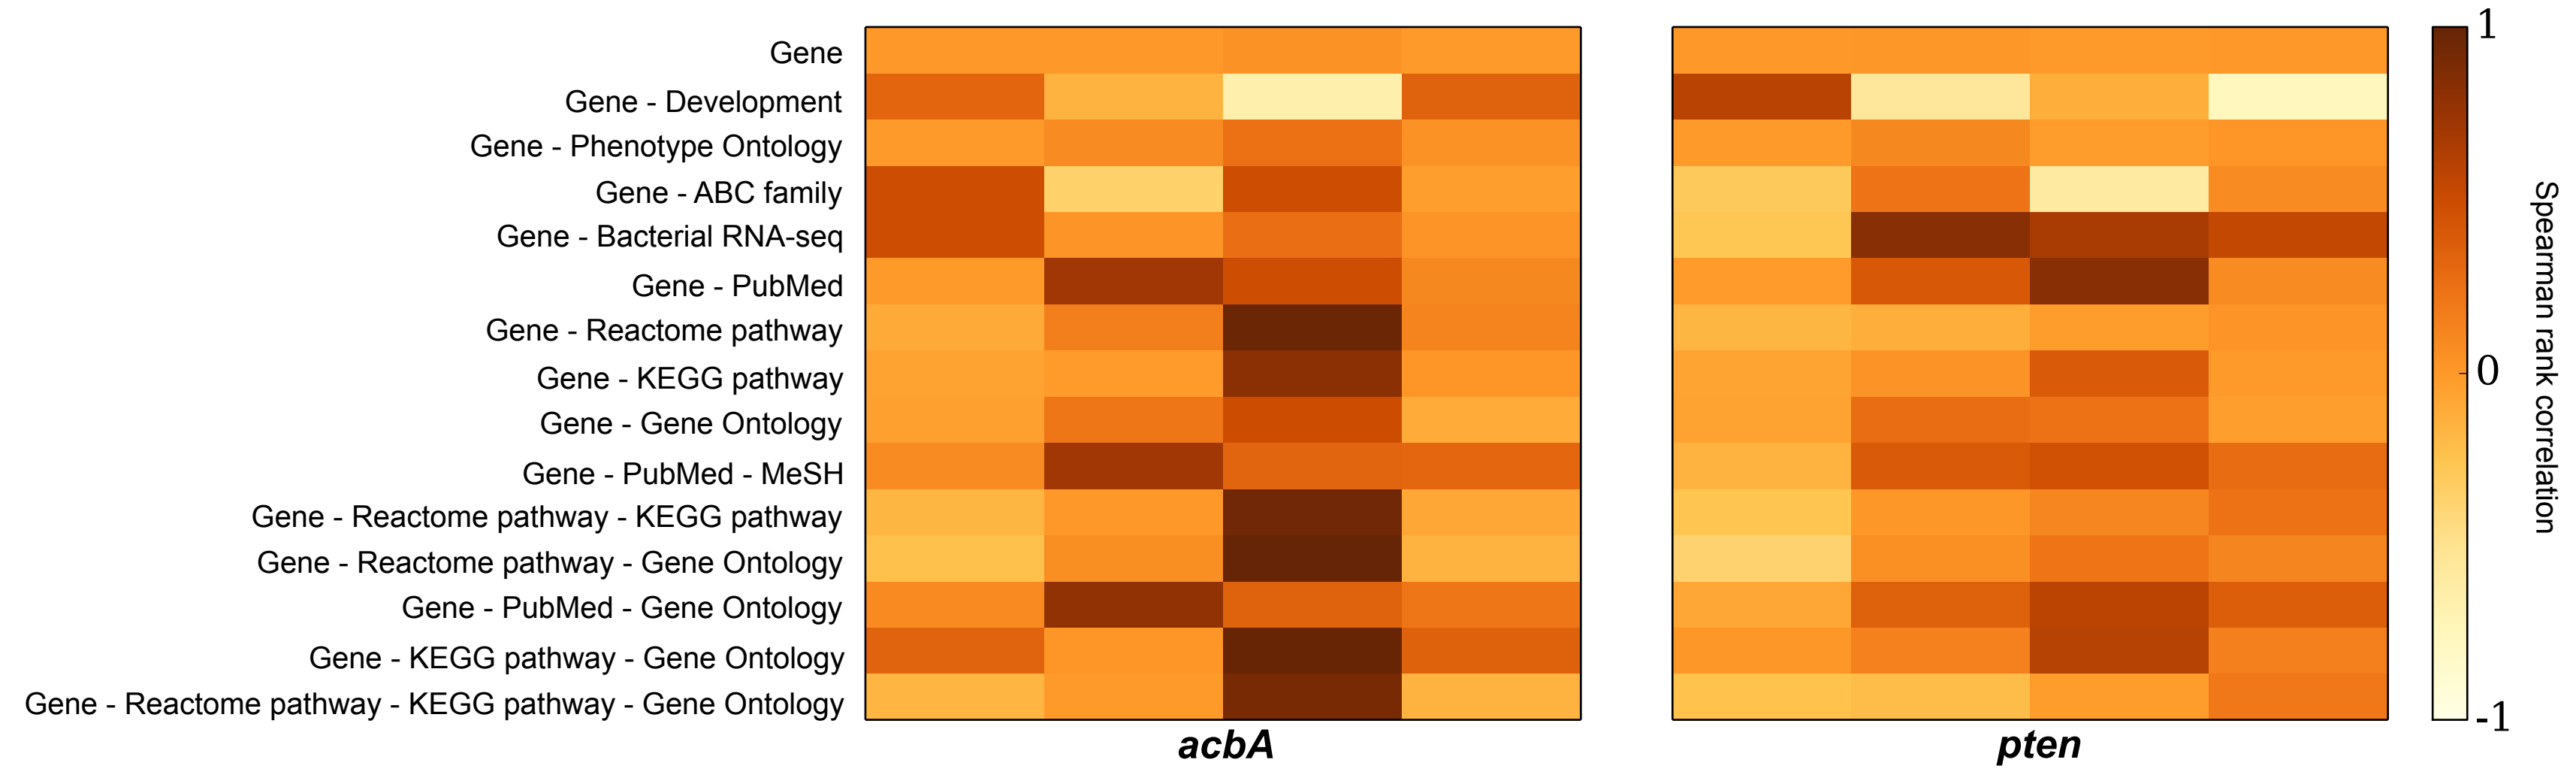

Supplement: pcbi.1004552.s007.pdf [file pcbi.1004552.s007.pdf]
