# Supplementary material for: Gene Prioritization by Compressive Data Fusion and Chaining
Source: PubMed Central journal article supplement (PMC4605714; doi:10.1371/journal.pcbi.1004552), 2015-10-14

**a**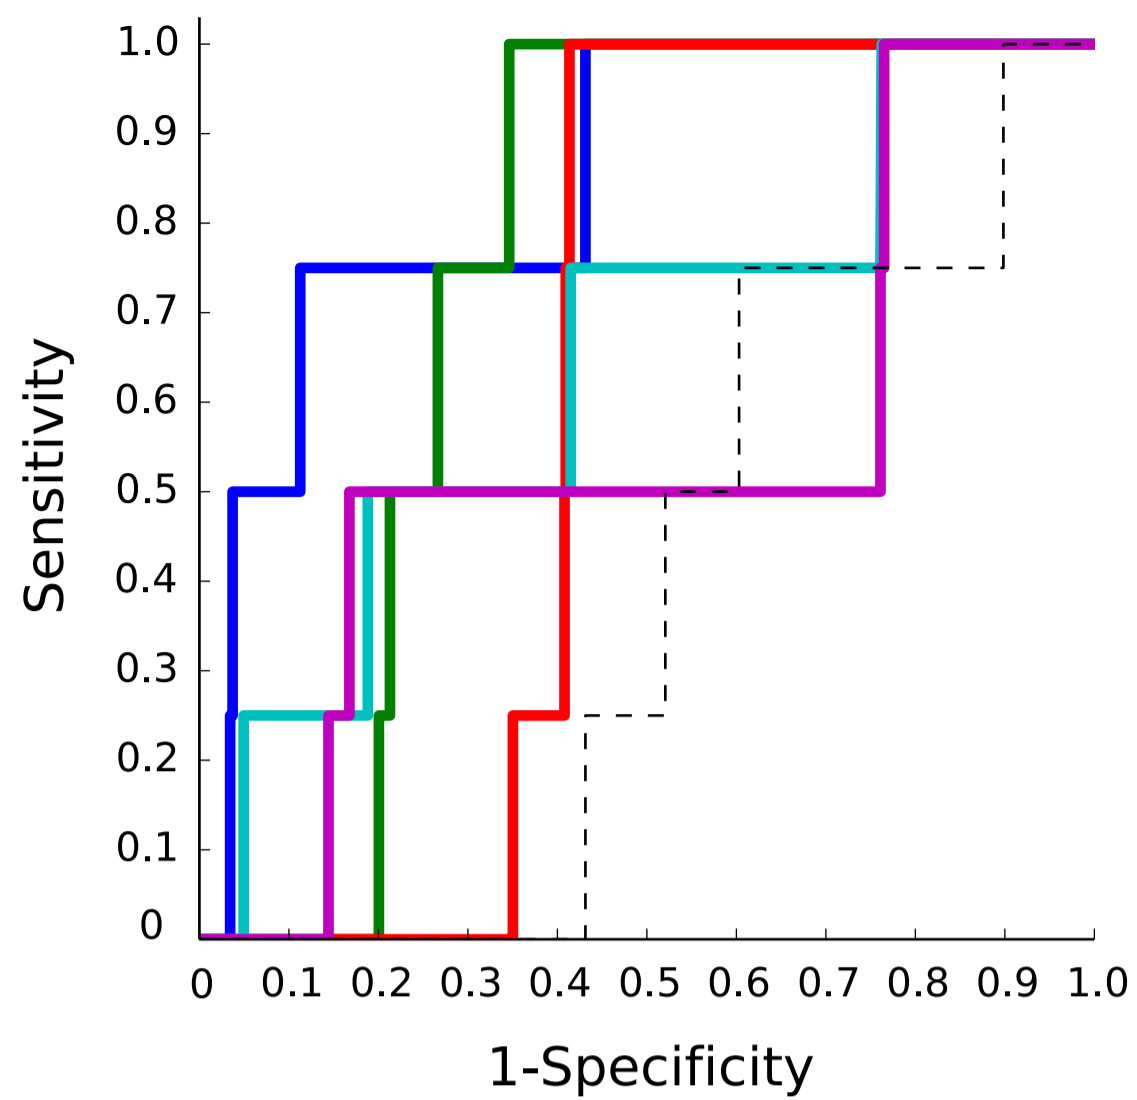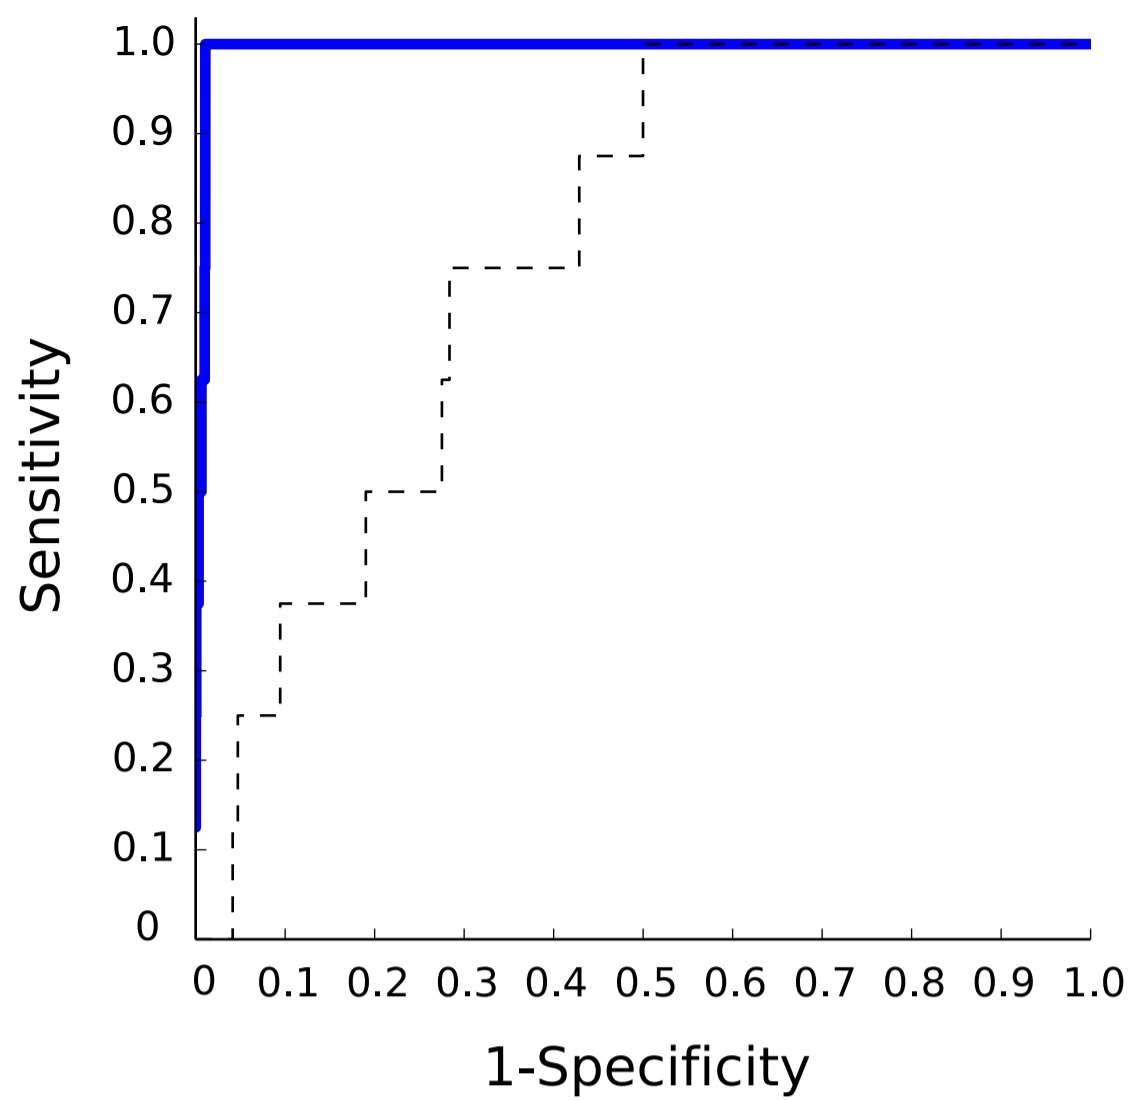**b**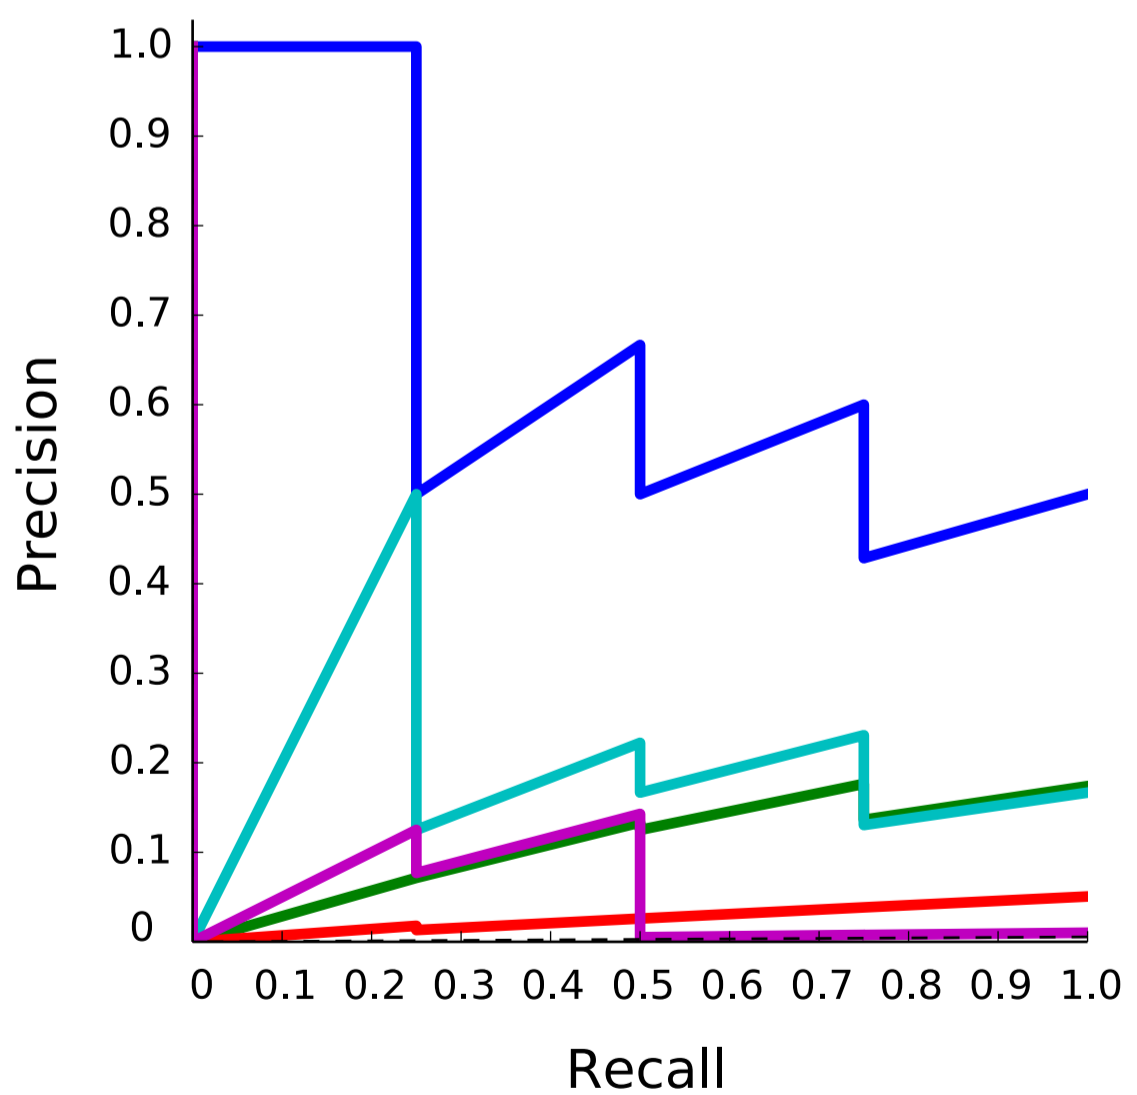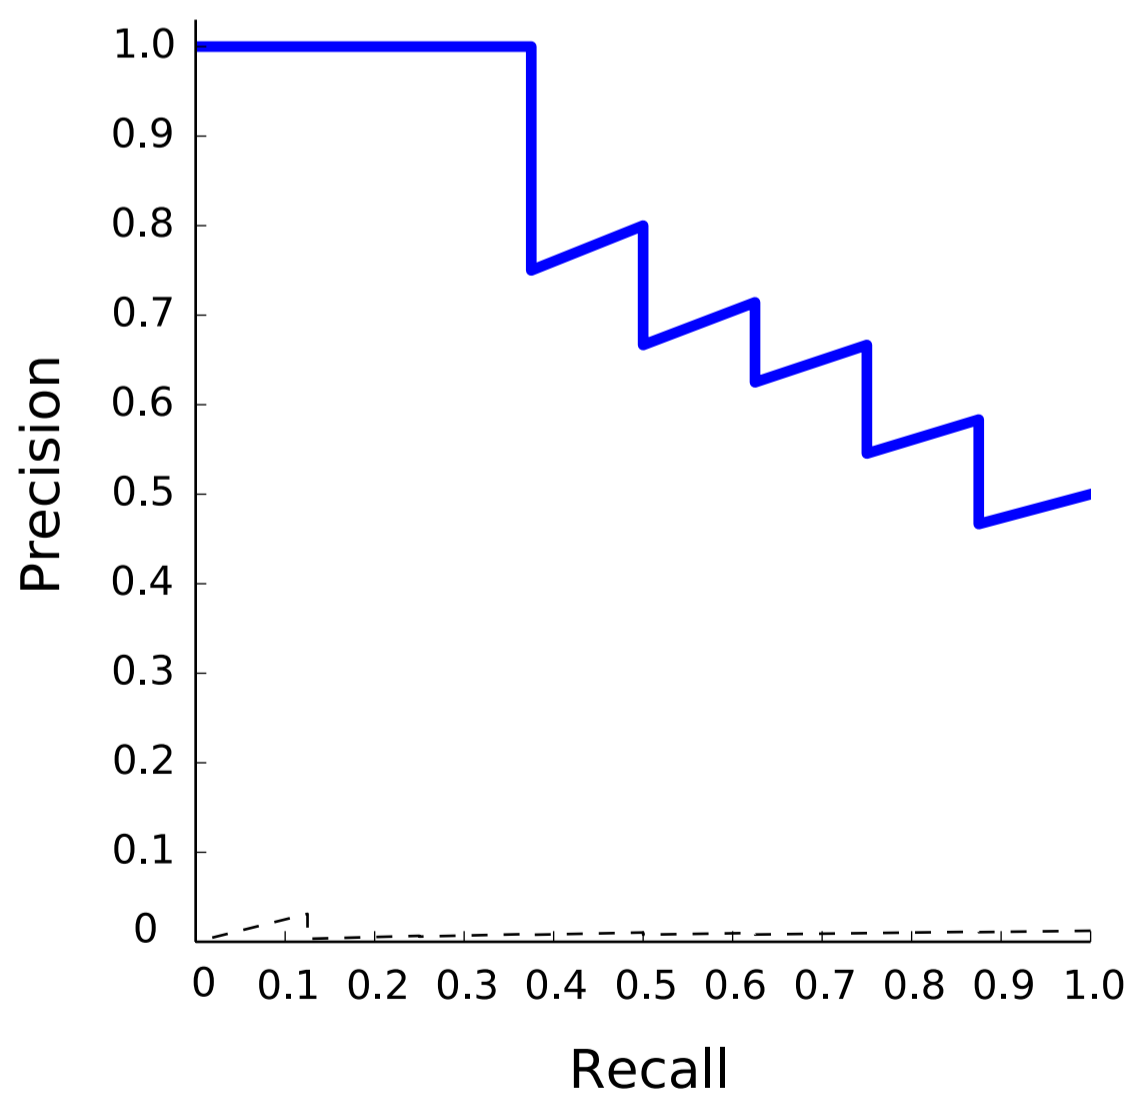

Supplement: pcbi.1004552.s010.pdf [file pcbi.1004552.s010.pdf]
